# Supplementary material for: Transcription Initiation Patterns Indicate Divergent Strategies for Gene Regulation at the Chromatin Level
Source: PLOS journal article supplement (doi:10.1371/journal.pgen.1001274), 2011-01-13
Supplement: S12 (10.1371/journal.pgen.1001274.s012) [file journal.pgen.1001274.s012]

| Time Point | Hours | Difference Threshold | False Positive Rate |
| --- | --- | --- | --- |
| 1 | 0-2 | 36.5 | 0.02 |
| 2 | 2-4 | 23.5 | 0.01 |
| 3 | 4-6 | 21 | 0.03 |
| 4 | 6-8 | 23.5 | 0.02 |
| 5 | 8-10 | 29.5 | 0.02 |
| 6 | 10-12 | 35 | 0.02 |
| 7 | 12-14 | 24.5 | 0.02 |
| 8 | 14-16 | 32 | 0.03 |
| 9 | 16-18 | 28 | 0.02 |
| 10 | 18-20 | 21 | 0.03 |
| 11 | 20-22 | 23 | 0.01 |
| 12 | 22-24 | 18.5 | 0.02 |
