# Supplementary material for: Transcription Initiation Patterns Indicate Divergent Strategies for Gene Regulation at the Chromatin Level
Source: PLOS journal article supplement (doi:10.1371/journal.pgen.1001274), 2011-01-13
Supplement: S15 (10.1371/journal.pgen.1001274.s015) [file journal.pgen.1001274.s015]

| *H.sap* | Type | NP/BP | NP/WP | BP/WP | NP/RI | BP/RI | WP/RI | Figure |
| --- | --- | --- | --- | --- | --- | --- | --- | --- |
|  | Profile | 1.75E-34 | 1.44E-34 | 3.43E-34 | 1.44E-34 | 1.44E-34 | 1.44E-34 | 1A |
| H2A.Z | Peak | 8.88E-37 | 6.89E-91 | 1.37E-09 | 1.70E-114 | 0 | 0 |
|  | NFR | 5.85E-13 | 2.46E-37 | 4.10E-06 | 1.52E-131 | 8.28E-275 | 0 |
|  | Profile | **0.0675** | **0.2985** | **0.0244** | **0.0113** | **0.1448** | **0.2663** |  |
| Bulk | Peak | 1.96E-05 | 1.02E-08 | **0.6310** | 1.99E-10 | 5.25E-32 | 3.43E-77 | 1B |
|  | NFR | **0.0039** | **0.1604** | **0.0109** | 3.56E-09 | 6.59E-23 | 6.50E-34 |  |
| DNase Hypersensitivity Sites | Profile | 1.42E-26 | 4.12E-30 | 4.62E-27 | 1.44E-34 | 1.44E-34 | 1.44E-34 | 1C |
|  | NFR | 4.38E-57 | 1.19E-179 | 2.18E-27 | 0 | 0 | 0 |
| polII | Profile | 1.35E-04 | 5.92E-06 | 1.20E-05 | 1.43E-34 | 1.44E-34 | 1.44E-34 | 1D |
| CTCF | Profile | 1.90E-12 | 3.84E-19 | 2.45E-12 | 1.43E-34 | 1.43E-34 | 1.44E-34 | 7A |
| H3K4me3 | Profile | 8.18E-33 | 2.66E-34 | 5.22E-34 | 1.44E-34 | 1.44E-34 | 1.44E-34 | SF5B |
| H3K4me2 | Profile | 3.29E-33 | 6.93E-34 | 4.81E-29 | 1.43E-34 | 1.44E-34 | 1.44E-34 | SF5D |
| H3K4me1 | Profile | 4.97E-25 | 4.56E-22 | 2.16E-09 | 1.43E-34 | 1.44E-34 | 1.44E-34 | SF5C |
| H2A.Z High Expression | Peak | 6.21E-14 | 9.86E-25 | **0.2939** |  |  |  | SF4A |
|  | NFR | 1.87E-04 | 6.46E-09 | **0.1082** |  |  |  |
| H2A.Z Medium Expression | Peak | 3.83E-16 | 4.75E-38 | 4.12E-05 |  |  |  | SF4A |
|  | NFR | 1.47E-06 | 1.76E-15 | **0.0061** |  |  |  |
| H2A.Z Low Expression | Peak | 4.74E-09 | 2.79E-29 | 6.65E-06 |  |  |  | SF4A |
|  | NFR | **0.0021** | 1.21E-13 | 1.36E-04 |  |  |  |
| H2A.Z No Expression | Peak | 1.05E-06 | 3.95E-14 | **0.0597** |  |  |  | SF4A |
|  | NFR | **1.54E-04** | **7.50E-08** | **0.3714** |  |  |  |
| H2A.Z With CpG Islands | Peak | 1.85E-14 | 2.15E-41 | 1.80E-08 |  |  |  | 3A |
|  | NFR | **0.1300** | 2.76E-06 | 2.43E-04 |  |  |  |
| H2A.Z No CpG Islands | Peak | 2.08E-34 | 2.34E-85 | 2.03E-05 |  |  |  | 3B |
|  | NFR | 1.44E-21 | 3.36E-59 | 2.43E-05 |  |  |  |
| H2A.Z With CpG |  |  |  |  | NP/NP | BP/BP | WP/WP | 3A,B |
| VS. | Peak |  |  |  | 1.13E-09 | **0.1056** | 1.50E-08 |
| H2A.Z No CpG | NFR |  |  |  | 1.61E-08 | **0.0681** | 3.26E-11 |
